# Supplementary material for: Drug susceptibility testing of Nocardia spp. using the disk diffusion method
Source: PubMed Central journal article supplement — Ann Clin Microbiol Antimicrob. 2024 Dec 18;23:105. doi: 10.1186/s12941-024-00768-2 (PMC11657736; doi:10.1186/s12941-024-00768-2), 2024-12-18
Supplement: 12941_2024_768_MOESM1_ESM.pdf [file 12941_2024_768_MOESM1_ESM.pdf]

1 **Additional files**

2 Table S1: *N. farcinica*, *N. cyriacigeorgica*, and *N. brasiliensis* isolates proportion (%  
 3 95%CI [;]) according to interpretative category S (susceptible), I (intermediate), and R  
 4 (resistant) for imipenem and ceftriaxone according to incubation time (48h or 72h). In bold,  
 5 results obtained for the antibiotic expected R for the species concerned according to  
 6 Clinical Laboratory Standard Institute.

|             |   | <i>Nocardia</i> isolates proportion, % 95%CI [;] |                             |                           |                      |                             |                               |
|-------------|---|--------------------------------------------------|-----------------------------|---------------------------|----------------------|-----------------------------|-------------------------------|
|             |   | <i>N. farcinica</i> ,                            |                             | <i>N. cyriacigeorgica</i> |                      | <i>N. brasiliensis</i>      |                               |
|             |   | 48h (n = 28)                                     | 72h (n = 31)                | 48h (n = 27)              | 72h (n = 31)         | 48h (n = 8)                 | 72h (n = 9)                   |
| ceftriaxone | S | <b>3.6</b><br>[0.1; 18.3]                        | <b>0</b><br>[0.0; 11.2]     | 77.8<br>[57.7; 91.4]      | 38.7<br>[21.8; 57.8] | 25.0<br>[3.2; 65.1]         | 11.1<br>[0.3; 48.2]           |
|             | I | <b>14.3</b><br>[4.0; 32.7]                       | <b>6.5</b><br>[0.8; 21.4]   | 14.8<br>[4.2; 33.7]       | 51.6<br>[33.1; 69.8] | 25.0<br>[3.2; 65.1]         | 11.1<br>[0.3; 48.2]           |
|             | R | <b>82.1</b><br>[63.1; 93.9]                      | <b>93.5</b><br>[78.6; 99.2] | 7.4<br>[0.9; 24.3]        | 9.7<br>[2.0; 25.8]   | 50.0<br>[15.7; 84.3]        | 77.8<br>[39.9; 97.2]          |
| imipenem    | S | 85.7<br>[67.3; 95.9]                             | 9.7<br>[2.0; 25.8]          | 100.0<br>[87.2; 100]      | 25.8<br>[11.9; 44.6] | <b>25.0</b><br>[3.2; 65.1]  | <b>0</b><br>[0; 33.6]         |
|             | I | 7.1<br>[0.9; 23.5]                               | 38.7<br>[21.8; 57.8]        | 0.0<br>[0.0; 12.8]        | 61.3<br>[42.2; 78.2] | <b>12.5</b><br>[0.3; 52.7]  | <b>0</b><br>[0; 33.6]         |
|             | R | 7.1<br>[0.9; 23.5]                               | 51.6<br>[33.1; 69.8]        | 0.0<br>[0.0; 12.8]        | 12.9<br>[3.6; 29.8]  | <b>62.5</b><br>[24.5; 91.5] | <b>100.0</b><br>[66.4; 100.0] |

7  
8

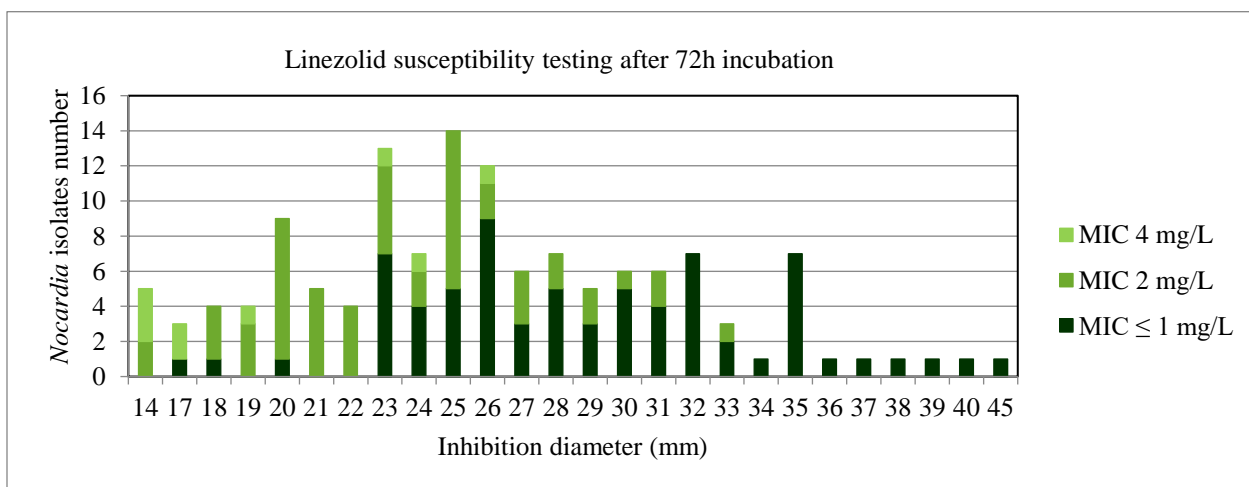

9  
 10 Figure S1: Distribution of *Nocardia* isolates (n = 134) according to the inhibition diameter  
 11 (mm) measured around the linezolid disk and their minimal inhibitory concentration (MIC)  
 12 for linezolid determined by broth microdilution using Sensititre™ Myco RAPMYCOI after  
 13 72h incubation. Shades of green: strains categorized as susceptible according to Clinical  
 14 Laboratory Standard Institute critical concentrations.

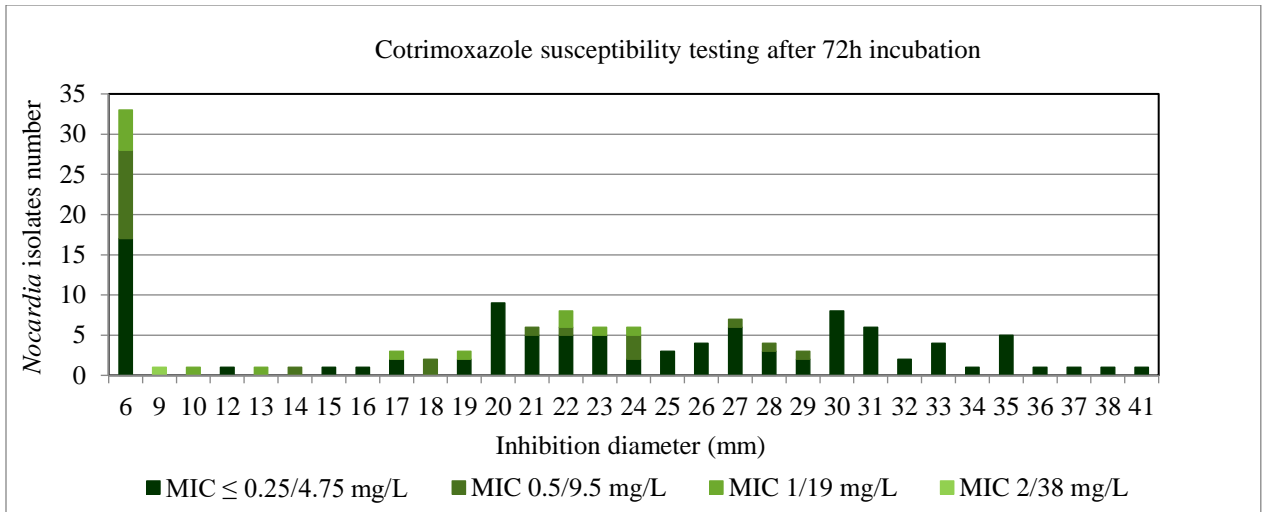

15  
 16 Figure S2: Distribution of *Nocardia* isolates (n = 134) according to the inhibition diameter  
 17 (mm) measured around the cotrimoxazole disk and their minimal inhibitory concentration  
 18 (MIC) for cotrimowazole determined by broth microdilution using Sensititre™ Myco  
 19 RAPMYCOI after 72h incubation. Shades of green: strains categorized as susceptible  
 20 according to Clinical Laboratory Standard Institute critical concentrations.  
 21  
 22

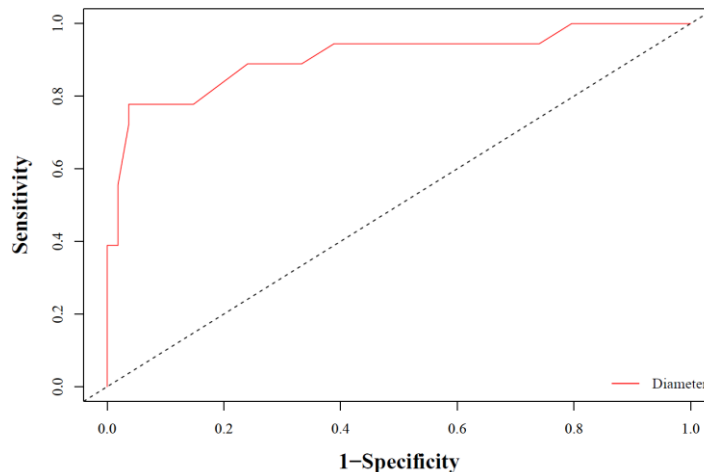

23  
 24 Figure S3: ROC curve of disk diffusion DST for imipenem after 48h incubation. Cut off  
 25 for Youden index = cut off of the point closest to the upper left-hand corner of the ROC  
 26 curve (ROC01) = 28 mm.

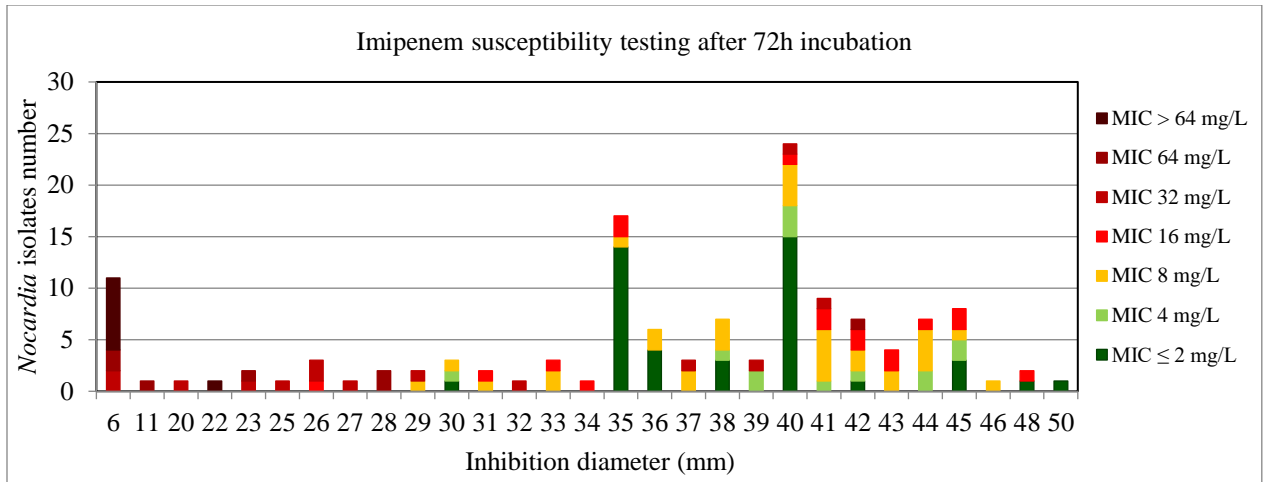

27  
 28 Figure S4: Distribution of *Nocardia* isolates (n = 134) according to the inhibition diameter  
 29 (mm) measured around the imipenem disk and their minimal inhibitory concentration  
 30 (MIC) for imipenem determined by broth microdilution using Sensititre™ Myco  
 31 RAPMYCOI after 72h incubation. Shades of green: strains categorized as susceptible;  
 32 orange: strains categorized as intermediate; shades of red: strains categorized as resistant  
 33 according to Clinical Laboratory Standard Institute critical concentrations.  
 34  
 35

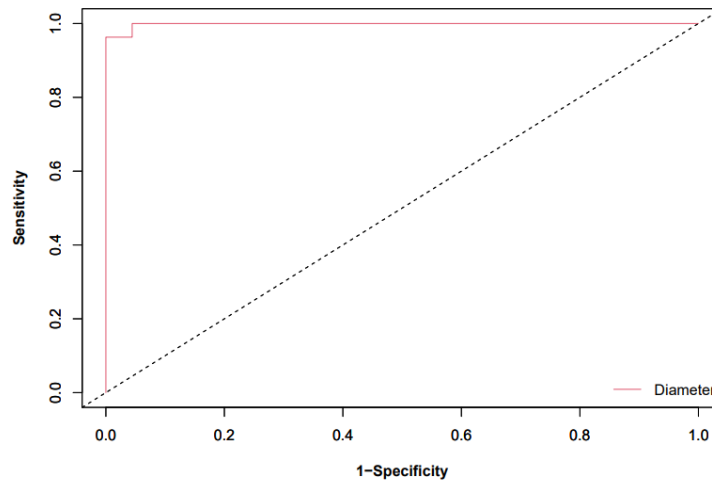

36  
 37 Figure S5: ROC curve of disk diffusion DST for imipenem after 72h incubation  
 38 excluding *N. farcinica* and *N. cyriacigeorgica* data. Cut off plot for Youden index = cut  
 39 off of the point closest to the upper left-hand corner of the ROC curve (ROC01) 29 mm.  
 40

41

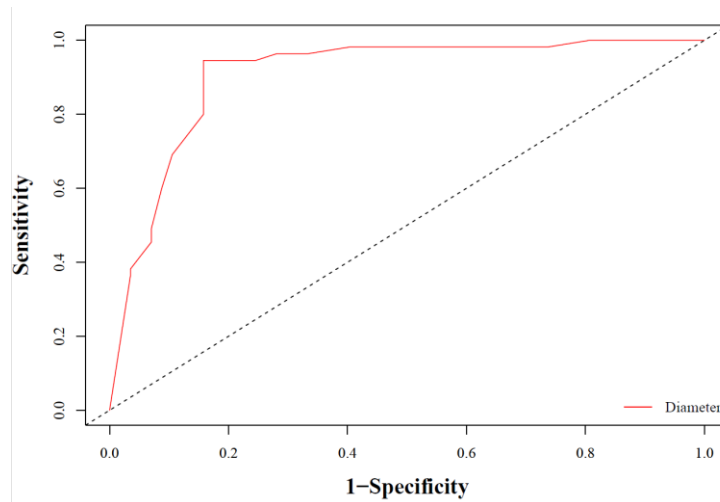

42  
43  
44  
45  
46  
47

Figure S6: ROC curve of disk diffusion DST for amoxicillin-clavulanate after 48h incubation. Cut off for Youden index = cut off of the point closest to the upper left-hand corner of the ROC curve (ROC01) = 20 mm.

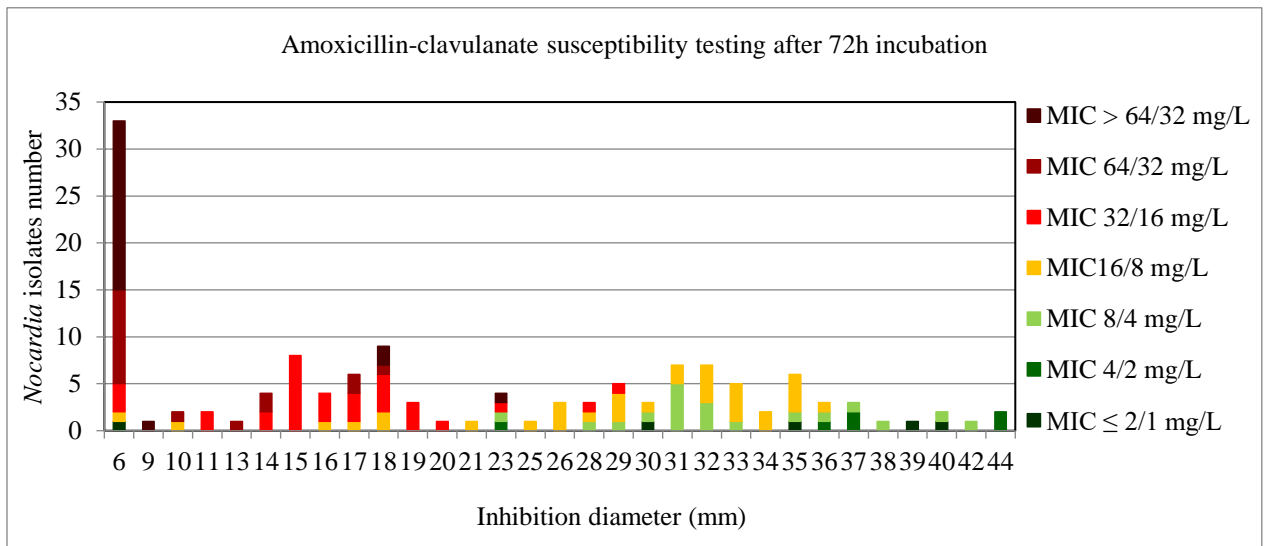

48  
49  
50  
51  
52  
53  
54  
55

Figure S7: Distribution of *Nocardia* isolates (n = 134) according to the inhibition diameter (mm) measured around the amoxicillin-clavulanate disk and their minimal inhibitory concentration (MIC) for amoxicillin-clavulanate determined by broth microdilution using Sensititre™ Myco RAPMYCOI after 72h incubation. Shades of green: strains categorized as susceptible; orange: strains categorized as intermediate; shades of red: strains categorized as resistant according to Clinical Laboratory Standard Institute critical concentrations.

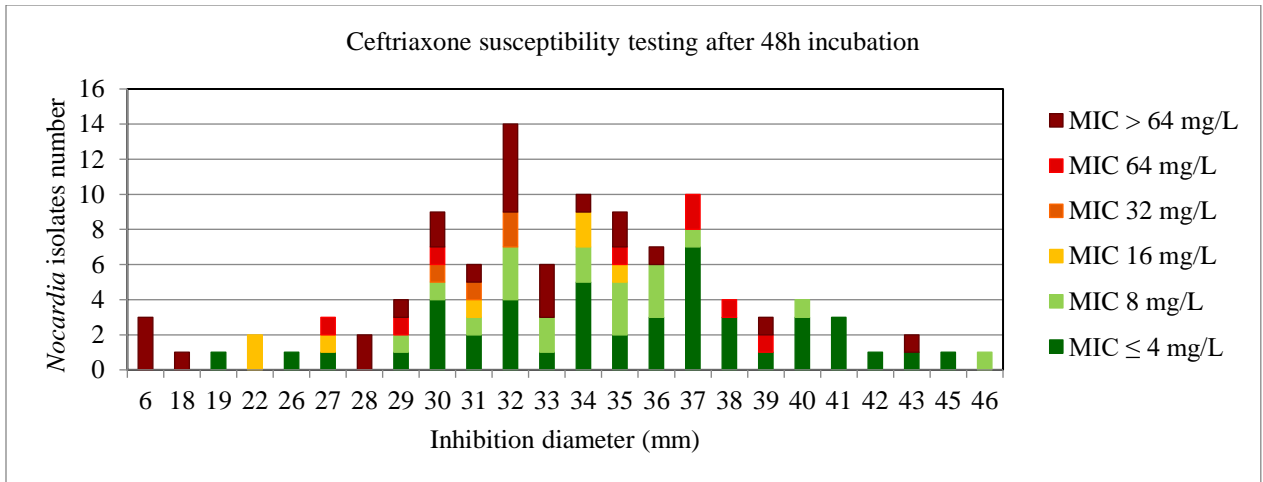

56  
 57 Figure S8: Distribution of *Nocardia* isolates (n = 107) according to the inhibition diameter  
 58 (mm) measured around the ceftriaxone disk and their minimal inhibitory concentration  
 59 (MIC) for ceftriaxone determined by broth microdilution using Sensititre™ Myco  
 60 RAPMYCOI after 48h incubation. Shades of green: strains categorized as susceptible;  
 61 shades of orange: strains categorized as intermediate; shades of red: strains categorized as  
 62 resistant according to Clinical Laboratory Standard Institute critical concentrations.

63  
 64

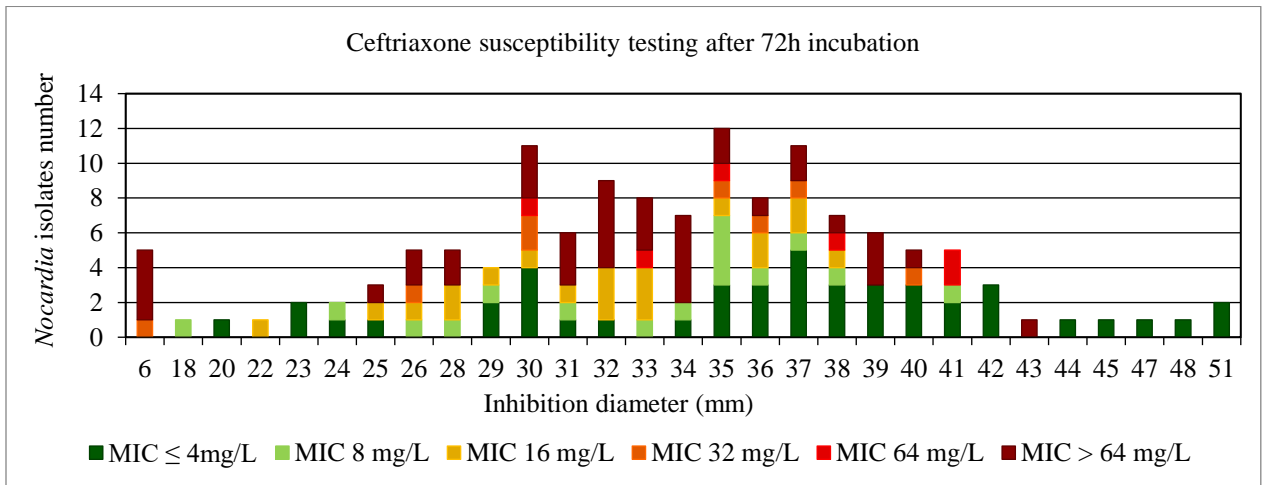

65  
 66 Figure S9: Distribution of *Nocardia* isolates (n = 134) according to the inhibition diameter  
 67 (mm) measured around the ceftriaxone disk and their minimal inhibitory concentration  
 68 (MIC) for ceftriaxone determined by broth microdilution using Sensititre™ Myco  
 69 RAPMYCOI after 72h incubation. Shades of green: strains categorized as susceptible;  
 70 shades of orange: strains categorized as intermediate; shades of red: strains categorized as  
 71 resistant according to Clinical Laboratory Standard Institute critical concentrations.

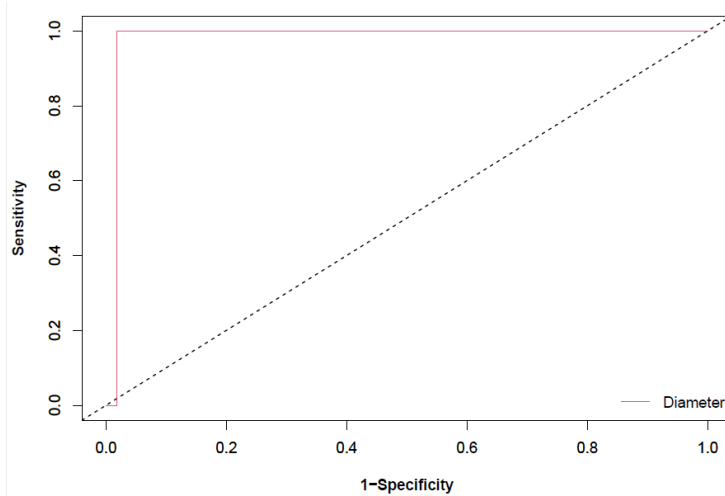

72  
73  
74  
75  
76  
77

Figure S10: ROC curve of disk diffusion DST for amikacin after 48h incubation. Cut off for Youden index = cut off of the point closest to the upper left-hand corner of the ROC curve (ROC01) = 31 mm.

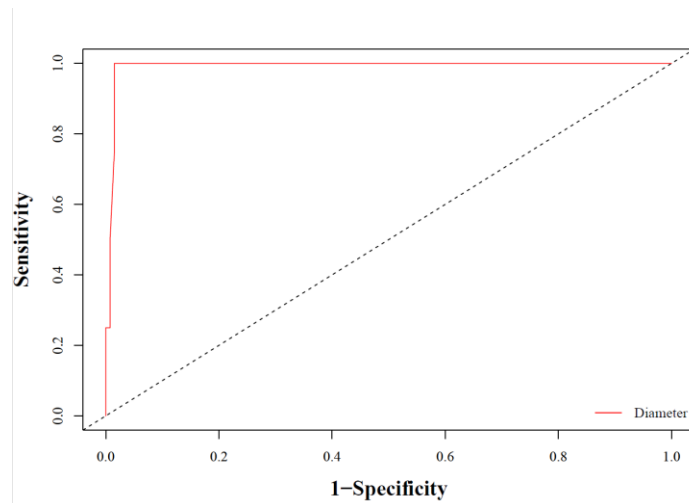

78  
79  
80  
81

Figure S11: ROC curve of disk diffusion DST for amikacin after 72h incubation. Cut off for Youden index = cut off of the point closest to the upper left-hand corner of the ROC curve (ROC01) = 25 mm.

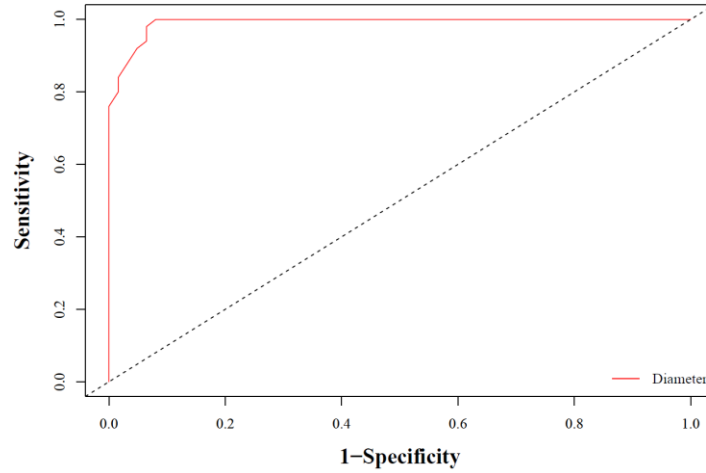

82  
83  
84  
85  
86  
87

Figure S12: ROC curve of disk diffusion DST for tobramycin after 48h incubation. Cut off plot for Youden index = 19 mm. Cut off of the point closest to the upper left-hand corner of the ROC curve (ROC01) = 18 mm.

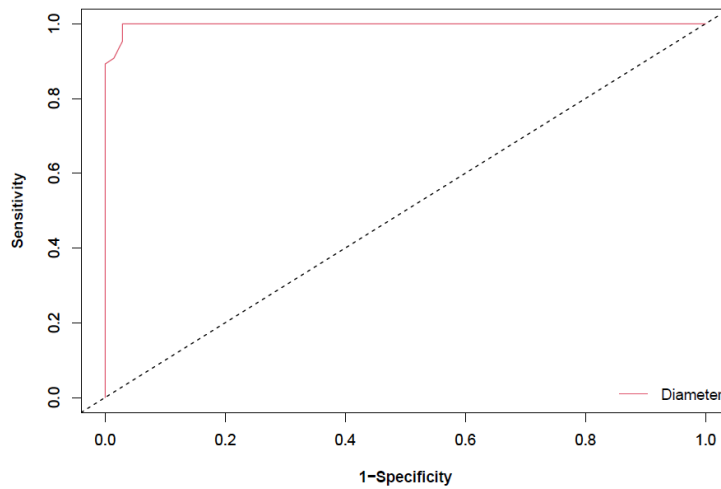

88  
89  
90  
91

Figure S13: ROC curve of disk diffusion DST for tobramycin after 72h incubation. Cut off for Youden index = cut off of the point closest to the upper left-hand corner of the ROC curve (ROC01) = 19 mm.

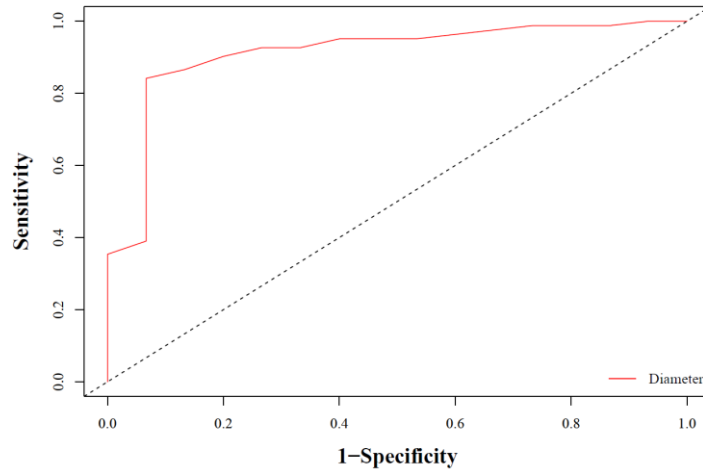

92  
93  
94  
95  
96  
97

Figure S14: ROC curve of disk diffusion DST for ciprofloxacin after 48h incubation. Cut off for Youden index = cut off of the point closest to the upper left-hand corner of the ROC curve (ROC01) = 24 mm.

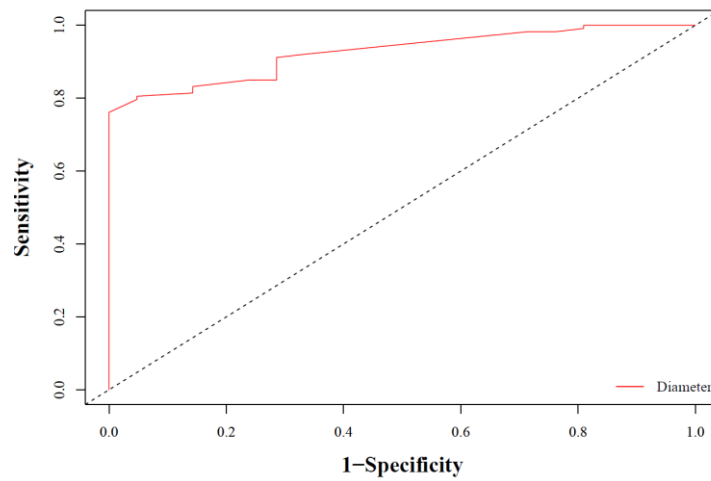

98  
99  
100  
101

Figure S15: ROC curve of disk diffusion DST for ciprofloxacin after 72h incubation. Cut off plot for Youden index = 25. Cut off of the point closest to the upper left-hand corner of the ROC curve (ROC01) = 27 mm.



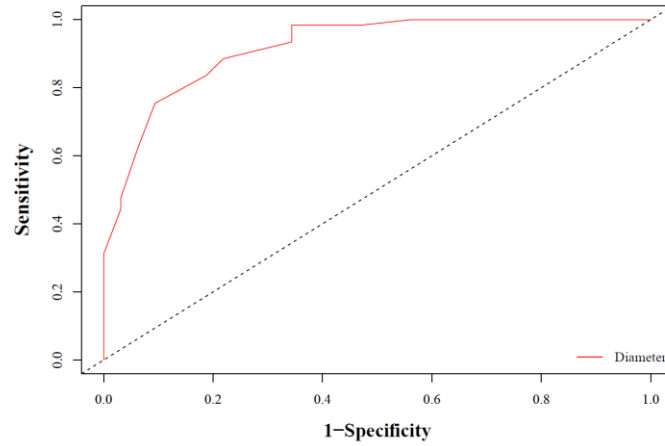

102  
103  
104  
105  
106  
107

Figure S16: ROC curve of disk diffusion DST for moxifloxacin after 48h incubation. Cut off for Youden index = cut off of the point closest to the upper left-hand corner of the ROC curve (ROC01) = 29 mm.

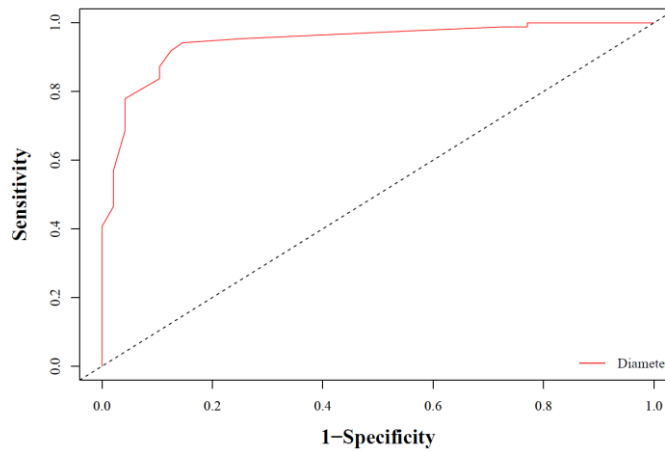

108  
109  
110  
111  
112

Figure S17: ROC curve of disk diffusion DST for moxifloxacin after 72h incubation. Cut off for Youden index = cut off of the point closest to the upper left-hand corner of the ROC curve (ROC01) = 33 mm.
